# Supplementary material
Source: MDPI journal article supplement (https://www.mdpi.com/2311-7524/10/4/370)
Supplement: s1 [file s1]

**Table S1.** Primers sequences for *PavWOX* genes

| Name of the primer | Forward primer sequence (5' -3' ) | Forward primer sequence (5' -3' )    |
|--------------------|-----------------------------------|--------------------------------------|
| PavWOX4            | ATGAAGGTGCACCAAGTTCGC             | TCATCTCCCTTCCGGATGTAATGG             |
| PavWOX13A          | ATGATGGAGTGGCAGCAGC               | TTACCAATCAAAATTTCCAAATCCTAACTC<br>GG |

| Name of the primer | Forward primer sequence (5' -3' ) | Forward primer sequence (5' -3' ) |
|--------------------|-----------------------------------|-----------------------------------|
| PavWOX1-q          | TTGTCTTGTCTCCTCCTCCTTCTC          | GTTGGCATTGGCATTGGCATGG            |
| PavWOX2-q          | CAAGGCAAGGCAGAGGCAGAAG            | GTTTCATATCCAGAGCCACCAGTGC         |
| PavWOX4-q          | TGGAACCCAACGCAAGAACAGATAG         | ACTTCGTCCGCCTTACAAACTACAC         |
| PavWOX5-q          | GGCGGCAATGGCAATAATGGAAC           | GCGTTTCTGTCTTTCTCTGGCTTTG         |
| PavWOX9-q          | TCGCTGGGTGTGAAGAAAGAAGTC          | CAGAGGAGGATGAGGAGGAAGAAGG         |
| PavWUS-q           | AACCTCAACAAACCCAACAACAACC         | TGCCTTCAATCTTGCCGTACTGTC          |
| PavWOX13A-q        | CCGTCACCTGCTCAACAGGATCTTAC        | CTTCTGGCTCTGCTTCTGATTCTCC         |
| PavWOX13B-q        | GGGAATGGGAATGGAGGAGTGTTG          | GTGCTGGCTCAGTTCAGAGGTTATC         |

**Table S2.** Accession numbers, genome loci and protein IDs of WOX homeodomains and full-length proteins

| Species                     | Name of HD/protein | Accession no./locus |
|-----------------------------|--------------------|---------------------|
| <i>Arabidopsis thaliana</i> | AtWUS              | NM127349            |
| <i>Arabidopsis thaliana</i> | AtWOX1             | AY251394            |
| <i>Arabidopsis thaliana</i> | AtWOX2             | AY251392            |
| <i>Arabidopsis thaliana</i> | AtWOX3             | AY251397            |
| <i>Arabidopsis thaliana</i> | AtWOX4             | AY251396            |
| <i>Arabidopsis thaliana</i> | AtWOX5             | AY251398            |
| <i>Arabidopsis thaliana</i> | AtWOX6             | AY251399            |
| <i>Arabidopsis thaliana</i> | AtWOX7             | NM120659            |
| <i>Arabidopsis thaliana</i> | AtWOX8             | AY251400            |
| <i>Arabidopsis thaliana</i> | AtWOX9             | AY251401            |
| <i>Arabidopsis thaliana</i> | AtWOX10            | AY101923            |
| <i>Arabidopsis thaliana</i> | AtWOX11            | AY251402            |
| <i>Arabidopsis thaliana</i> | AtWOX12            | AY251403            |
| <i>Arabidopsis thaliana</i> | AtWOX13            | AY251404            |
| <i>Arabidopsis thaliana</i> | AtWOX14            | NM101922            |
| <i>Picea abies</i>          | PaWOX4             | JX411948            |
| <i>Populus trichocarpa</i>  | PtrWOX1a           | XP_024438050        |
| <i>Populus trichocarpa</i>  | PtrWOX1b           | XP_024442258        |
| <i>Populus trichocarpa</i>  | PtrWOX1c           | XP_002314802        |
| <i>Populus trichocarpa</i>  | PtrWOX2a           | XP_024456166        |
| <i>Populus trichocarpa</i>  | PtrWOX2b           | XP_002313442        |
| <i>Populus trichocarpa</i>  | PtrWOX4b           | XP_006374903        |
| <i>Populus trichocarpa</i>  | PtrWOX4a           | XP_002301170        |
| <i>Populus trichocarpa</i>  | PtrWOX5a           | XP_002312145        |
| <i>Populus trichocarpa</i>  | PtrWOX5b           | XP_002315173        |
| <i>Populus trichocarpa</i>  | PtrWOX8/9a         | XP_024454266        |
| <i>Populus trichocarpa</i>  | PtrWOX8/9b         | XP_024467324        |
| <i>Populus trichocarpa</i>  | PtrWOX11/12a       | XP_002319197        |
| <i>Populus trichocarpa</i>  | PtrWOX11/12b       | XP_052305523        |
| <i>Populus trichocarpa</i>  | PtrWOX13a          | XP_002306432        |
| <i>Populus trichocarpa</i>  | PtrWOX13b          | XP_002306983        |
| <i>Populus trichocarpa</i>  | PtrWOX13c          | XP_002301917        |
| <i>Populus trichocarpa</i>  | PtrWUSa            | XP_006383114        |
| <i>Populus trichocarpa</i>  | PtrWUSb            | KAI5581353          |
| <i>Picea abies</i>          | PaWUS              | AGL54197            |
| <i>Picea abies</i>          | PaWOX2             | CAL18267            |
| <i>Picea abies</i>          | PaWOX3             | AGL53581            |
| <i>Picea abies</i>          | PaWOX4             | AGL53582            |
| <i>Picea abies</i>          | PaWOX5             | AGL53583            |
| <i>Picea abies</i>          | PaWOX8A            | AGL53584            |

|                                 |                    |                  |
|---------------------------------|--------------------|------------------|
| <i>Picea abies</i>              | PaWOX8B            | AGL53585         |
| <i>Picea abies</i>              | PaWOX8C            | AGL53586         |
| <i>Picea abies</i>              | PaWOX8D            | AGL53587         |
| <i>Picea abies</i>              | PaWOX8/9           | ADF42580         |
| <i>Picea abies</i>              | MA_1910g0010       | MA_1910g0010     |
| <i>Picea abies</i>              | MA_10344604g0010   | MA_10344604g0010 |
| <i>Picea abies</i>              | MA_8850184g0010    | MA_8850184g0010  |
| <i>Picea abies</i>              | MA_747816g0010     | MA_747816g0010   |
| <i>Picea abies</i>              | MA_59896g0010      | MA_59896g0010    |
| <i>Picea abies</i>              | MA_129591g0010     | MA_129591g0010   |
| <i>Picea abies</i>              | MA_42637g0010      | MA_42637g0010    |
| <i>Picea abies</i>              | MA_116716g0010     | MA_116716g0010   |
| <i>Picea abies</i>              | MA_10432361g0010   | MA_10432361g0010 |
| <i>Picea abies</i>              | MA_128969g0010     | MA_128969g0010   |
| <i>Prunus persica</i>           | Prupe.1G432100.1.p | XP_007223910     |
| <i>Prunus persica</i>           | Prupe.2G247100.1.p | XP_007220856     |
| <i>Prunus persica</i>           | Prupe.4G055300.1.p | XP_020418316     |
| <i>Prunus persica</i>           | Prupe.5G009600.1.p | XP_007209586     |
| <i>Prunus persica</i>           | Prupe.5G232600.1.p | XP_020419129     |
| <i>Prunus persica</i>           | Prupe.6G080100.1.p | XP_007207641     |
| <i>Prunus persica</i>           | Prupe.6G088900.1.p | XP_020422427     |
| <i>Prunus persica</i>           | Prupe.7G016600.1.p | XP_007203525     |
| <i>Prunus persica</i>           | Prupe.7G167700.1.p | XP_007203178     |
| <i>Prunus persica</i>           | Prupe.7G183300.1.p | XP_007203410     |
| <i>Ostreococcus tauri</i>       | OtWOX              | XM_003082558     |
| <i>Ostreococcus lucimarinus</i> | OIWOX              | XM_001420899     |

---

**Table S3. Conserved motifs of *WOX* genes in sweet cherry.**

| Number | Name                                                                   |
|--------|------------------------------------------------------------------------|
| 1      | ERLYRSGTRTPSAEQIQKITAQLRQYGKIEGKNVIFYWFQNHKARERQKQR                    |
| 2      | RWNPTPEQIRIL                                                           |
| 3      | LYVKVMTDEQLELLRKQIAVYASICEQLVEMHKNLTAQQDLAGMRLGNFYCD<br>PFMASGGHKITARQ |
| 4      | TLPLFPL                                                                |
| 5      | ATNHGESEAEPEVDSPKDKKTRPE                                               |
| 6      | MMEW                                                                   |
| 7      | FYD                                                                    |
| 8      | VFIDDVA                                                                |
| 9      | GFC                                                                    |
| 10     | HPPTHLPJNTPVCC                                                         |
